# Supplementary material for: Time-resolved analysis of DNA-protein interactions in living cells by UV laser pulses
Source: Sci Rep. 2017 Sep 15;7:11725. doi: 10.1038/s41598-017-12010-5 (PMC5601431; doi:10.1038/s41598-017-12010-5)
Supplement: Supplementary file 1 — Supplementary Information [file 41598_2017_12010_MOESM1_ESM.pdf]

# Time-resolved analysis of DNA-protein interactions in living cells by UV laser pulses

Angela Nebbioso<sup>1,\*§</sup>, Rosaria Benedetti<sup>1,§</sup>, Mariarosaria Conte<sup>2</sup>, Vincenzo Carafa<sup>1</sup>,  
Floriana De Bellis<sup>1,3</sup>, Jani Shaik<sup>3</sup>, Filomena Matarese<sup>3</sup>, Bartolomeo Della Ventura<sup>4</sup>,  
Felice Gesuele<sup>4</sup>, Raffaele Velotta<sup>4</sup>, Joost HA Martens<sup>1,3</sup>, Hendrik G. Stunnenberg<sup>3</sup>,  
Carlo Altucci<sup>4,\*</sup>, Lucia Altucci<sup>1,\*</sup>.

<sup>1</sup> Dipartimento di Biochimica, Biofisica e Patologia Generale, Università degli Studi della Campania "L. Vanvitelli", Vico L. De Crecchio 7, 80138, Napoli, IT

<sup>2</sup> IRCCS SDN, Via E. Gianturco, 113, 80143, Napoli, IT

<sup>3</sup> Department of Molecular Biology, NCMLS, Radboud University, 6500 Nijmegen, NL

<sup>4</sup> Dipartimento di Fisica, Università di Napoli Federico II, Via Cinthia, 80100, Napoli, IT

§ Equal first authors

\*To whom correspondence should be addressed. Tel: +390815667569; Fax: +39 081450169; Email: lucia.altucci@unicampania.it

Correspondence may also be addressed to Angela Nebbioso. Tel: +390815665682; Fax: +39081450169; Email: angela.nebbioso@unicampania.it and Carlo Altucci. Tel. +39081679286; Email carlo.altucci@unina.it

## Abstract

### **Immunoprecipitation assay**

MDA-ER $\alpha$ -GFP extracts were incubated in NP-40 (0.5%), Tris-HCl pH 8.0 (20 mM), NaCl, (150 mM), PMSF (1 mM), 10% glycerol, EDTA (1 mM) and 1X protease inhibitor mix (Sigma) for 20' on ice. Cell debris was removed and the soluble incubated with anti-GFP and anti-ER $\alpha$  overnight at 4°C. The immune complexes were isolated by adding agarose-protein A/G Plus (Santa-Cruz) for 2h at 4°C. Proteins were then eluted, resuspended and analyzed by Western blot.

### **Immunofluorescence experiment**

MDA-ER $\alpha$ -GFP cells were grown on gelatin-coated slides and then incubated with anti-ER $\alpha$  (Santa Cruz) according to manufacture's instructions. Nuclei were stained with Hoechst for 10 minutes; images were analyzed by fluorescence microscope (Zeiss).

### **In Fluorescence Experiments**

Cells, irradiated and not were gently lysed to preserve the integrity of nuclear membranes. Nuclei were then sonicated and the chromatin was recovered. The protein ER $\alpha$ -GFP linked to DNA (on ERE sequences) was purified and the quantity of GFP signal was measured by a multimode reader Infinite M200 Pro (Tecan) at 485 nm and 520 nm.

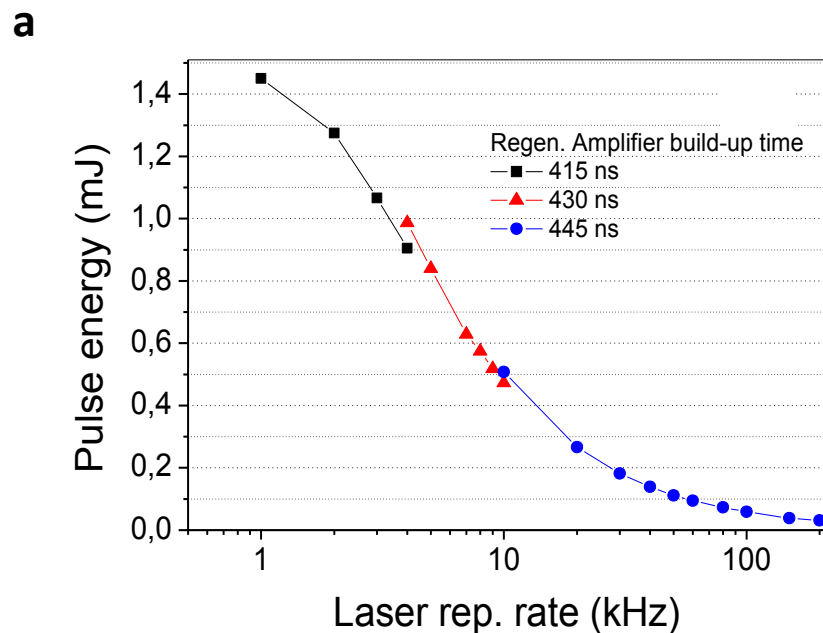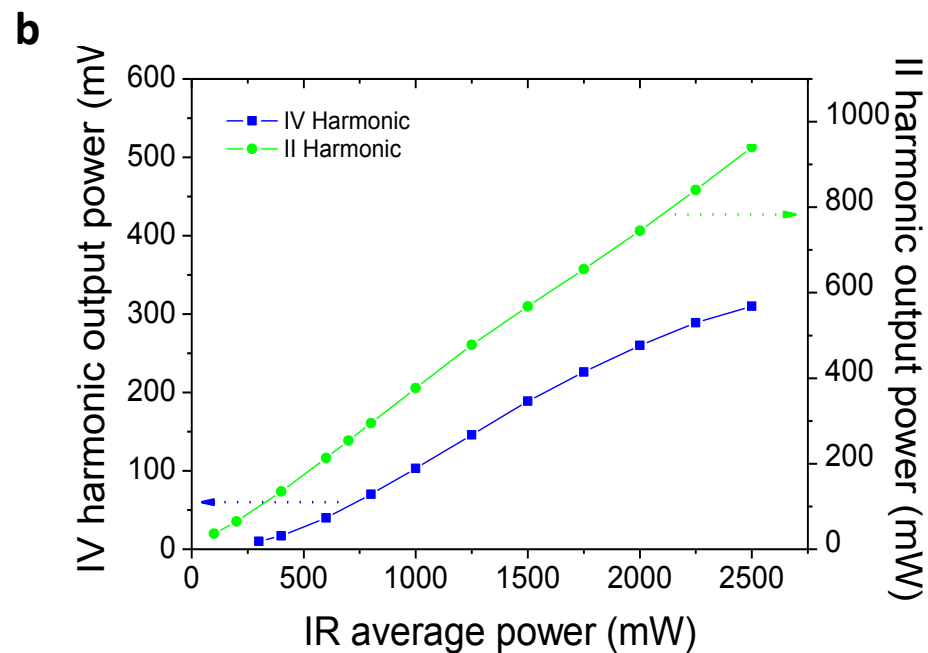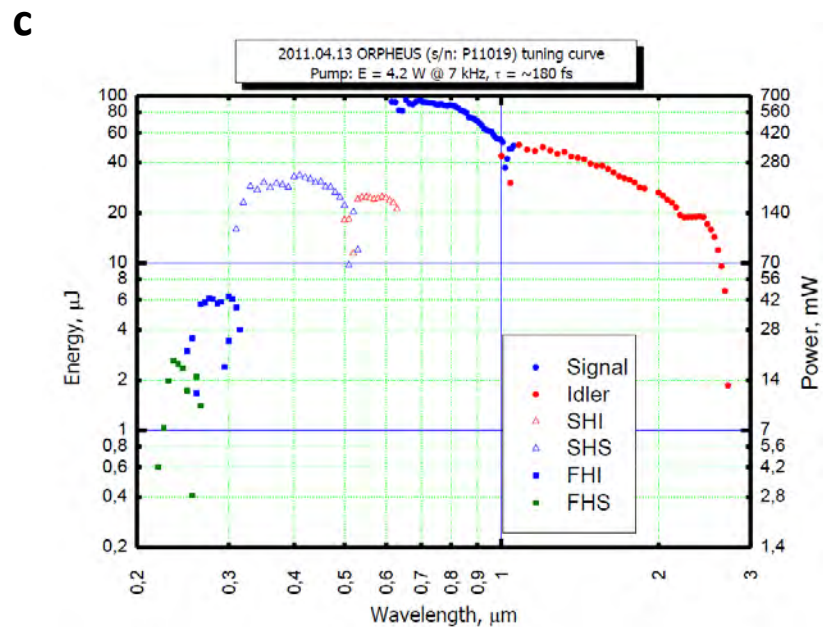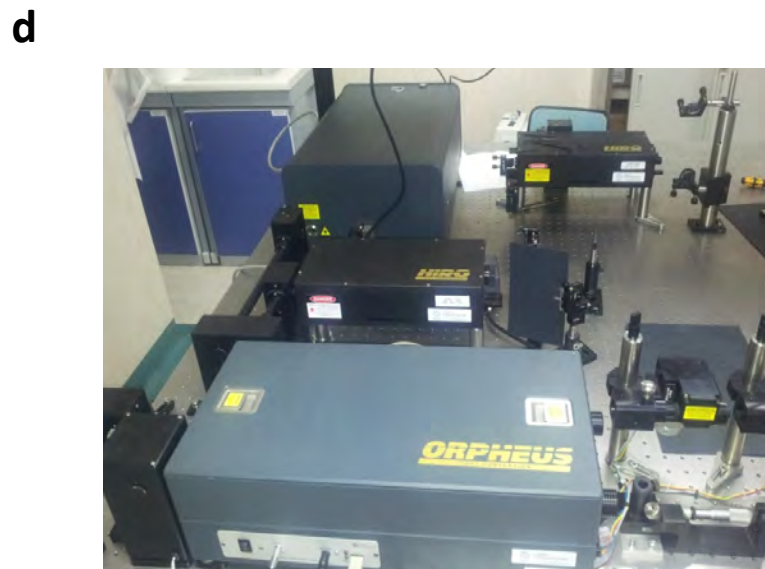

Supplementary Figure S1: Pharos-based laser parameter settings

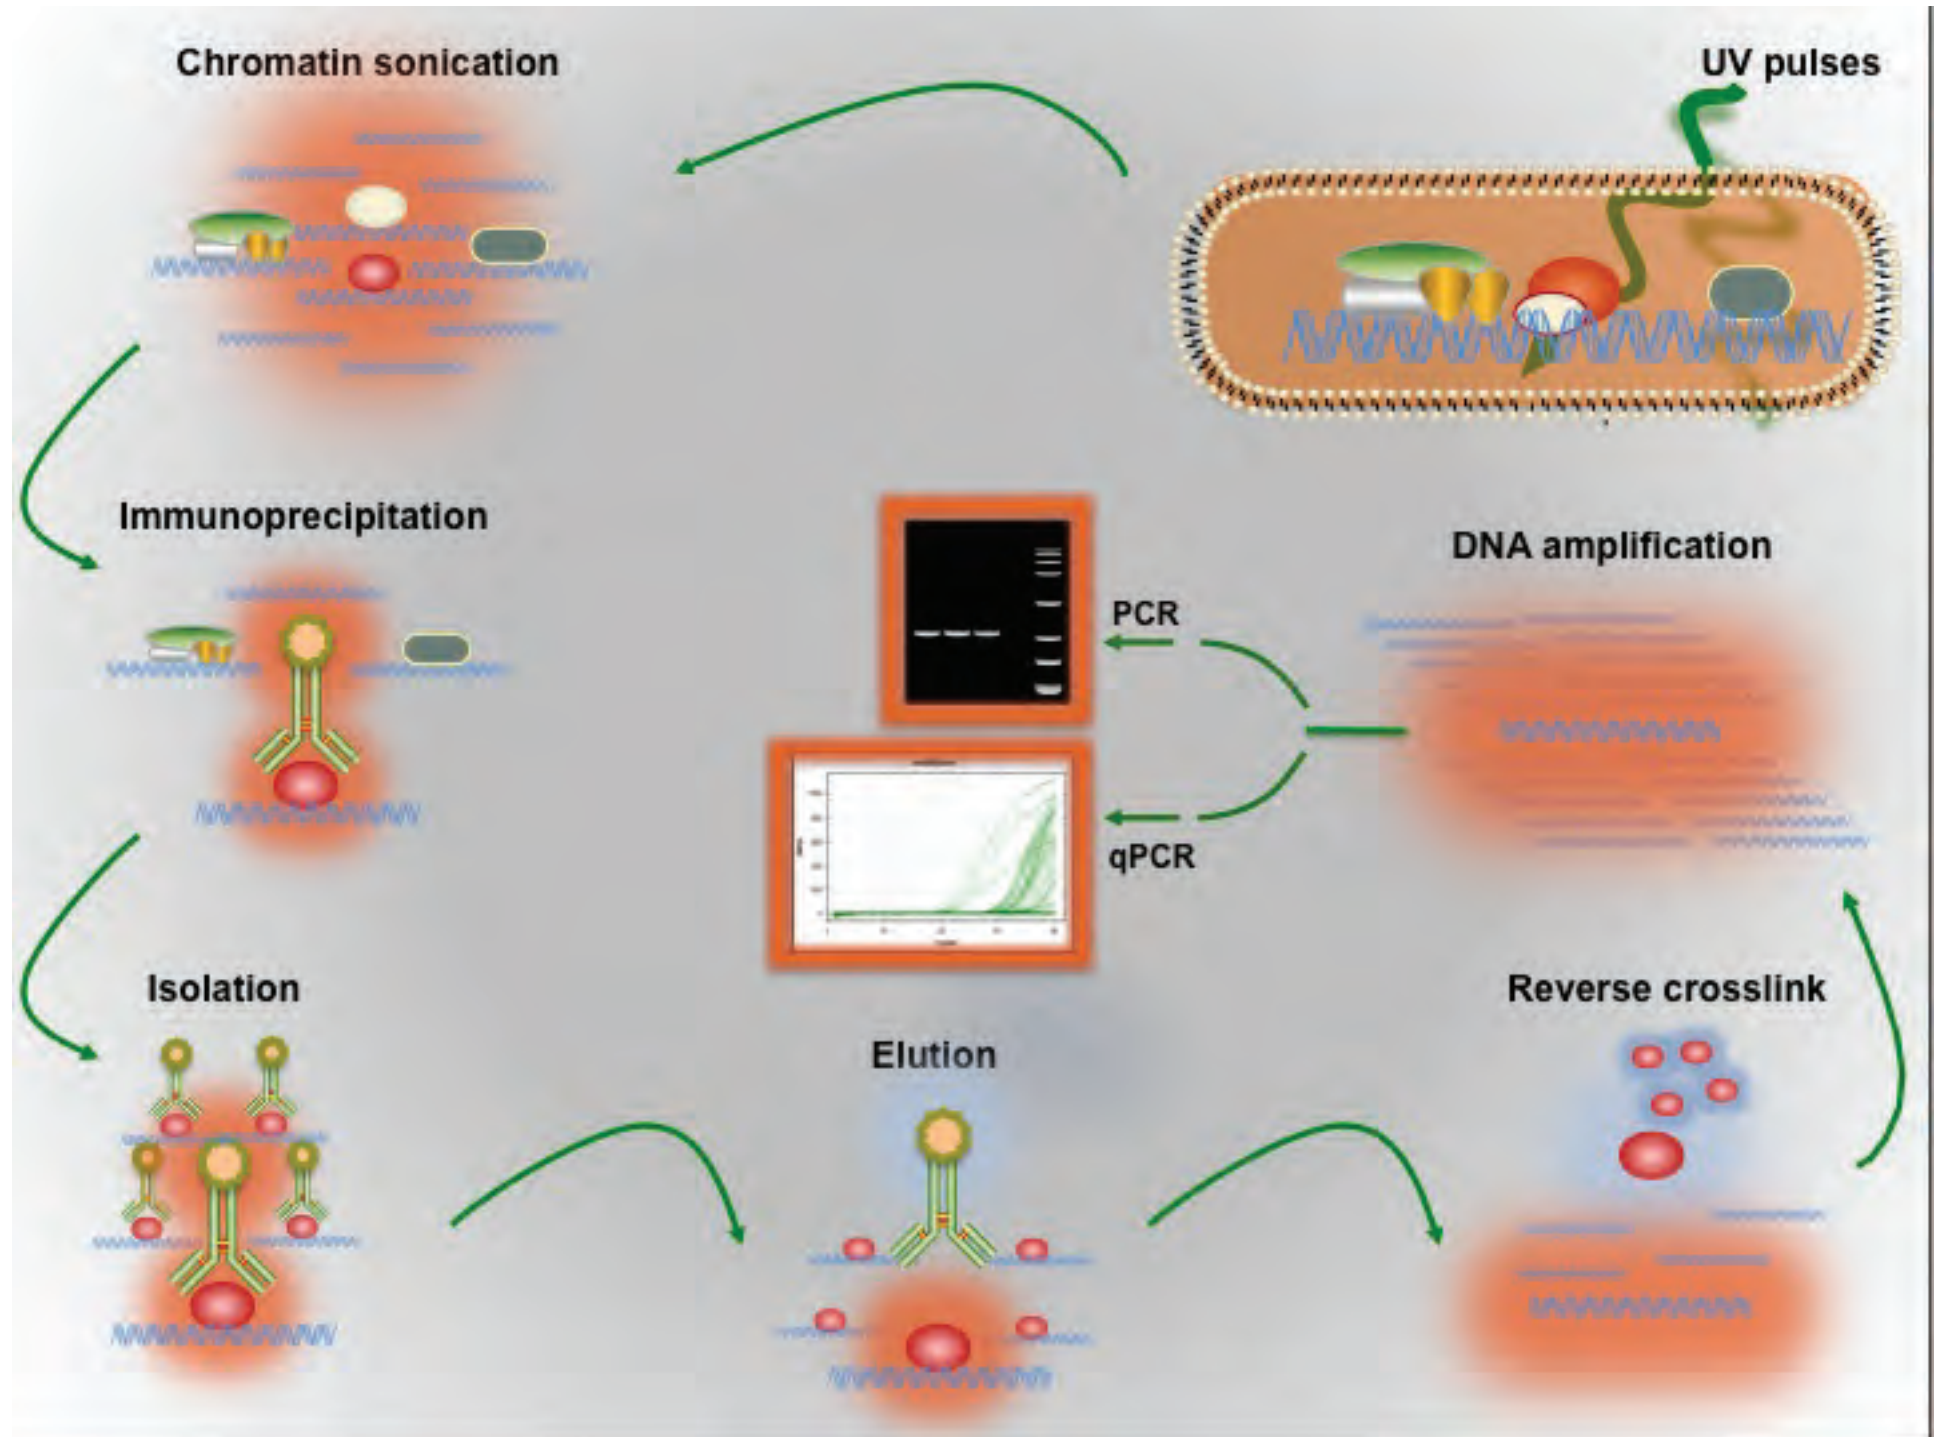

Supplementary Figure S2: Chromatin immunoprecipitation scheme.

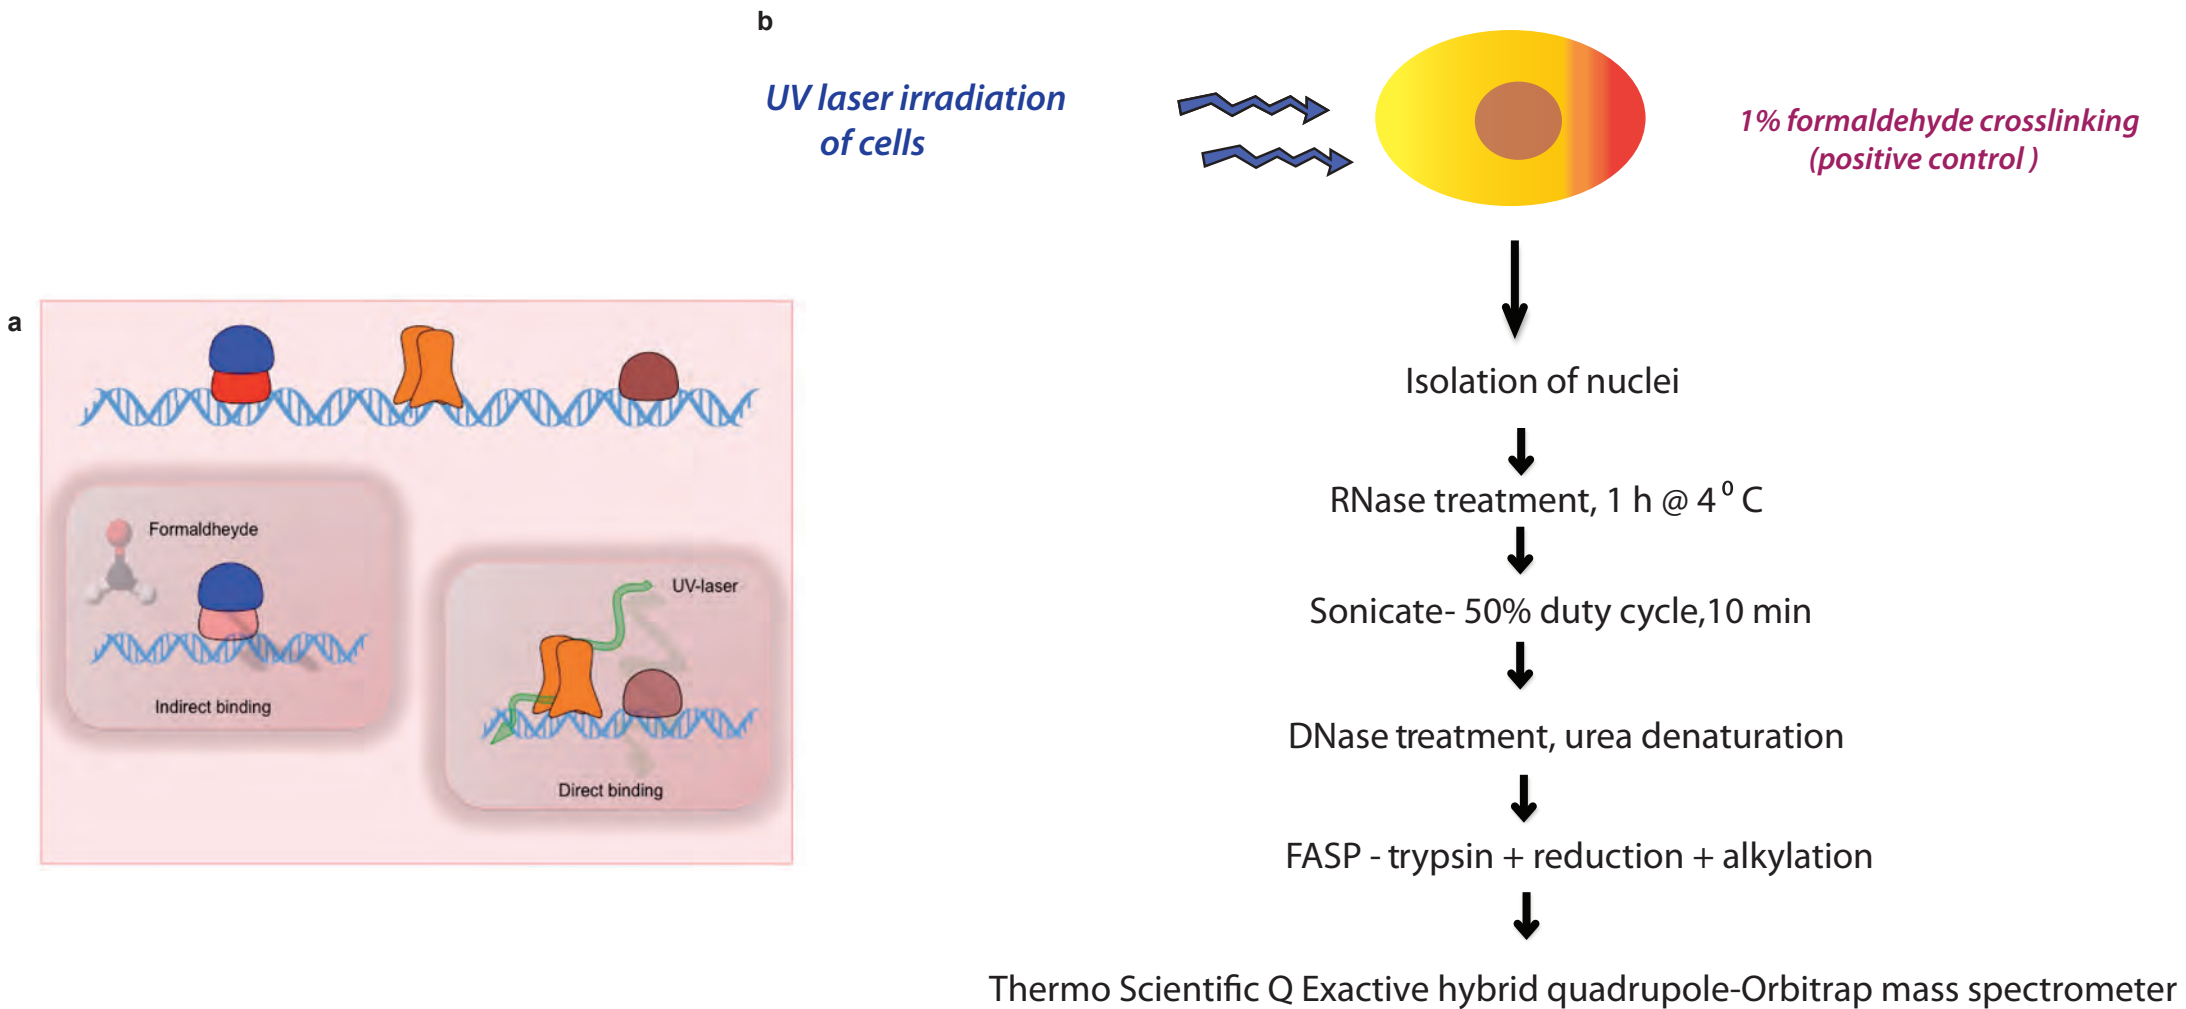

Supplementary Figure S3: (a) Formaldehyde- and UV laser-mediated bindings; (b) MS/MS procedure scheme.

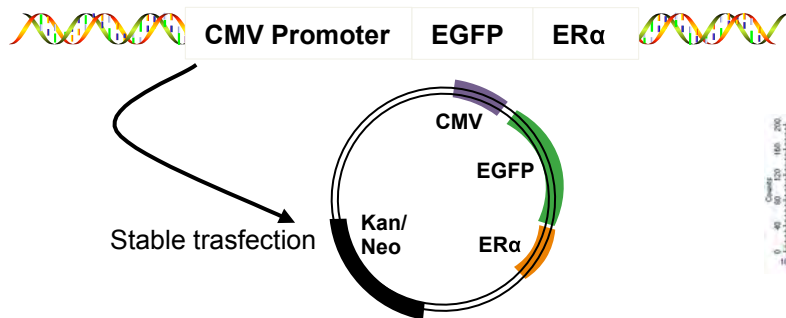

Transfection efficiency evaluation

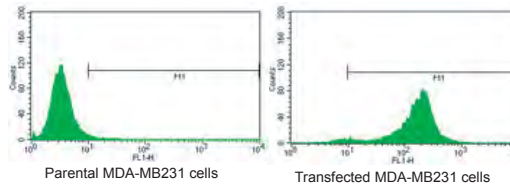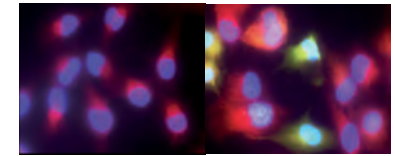

ERα signal

ERα GFP signal

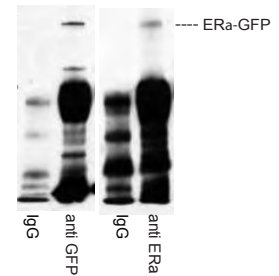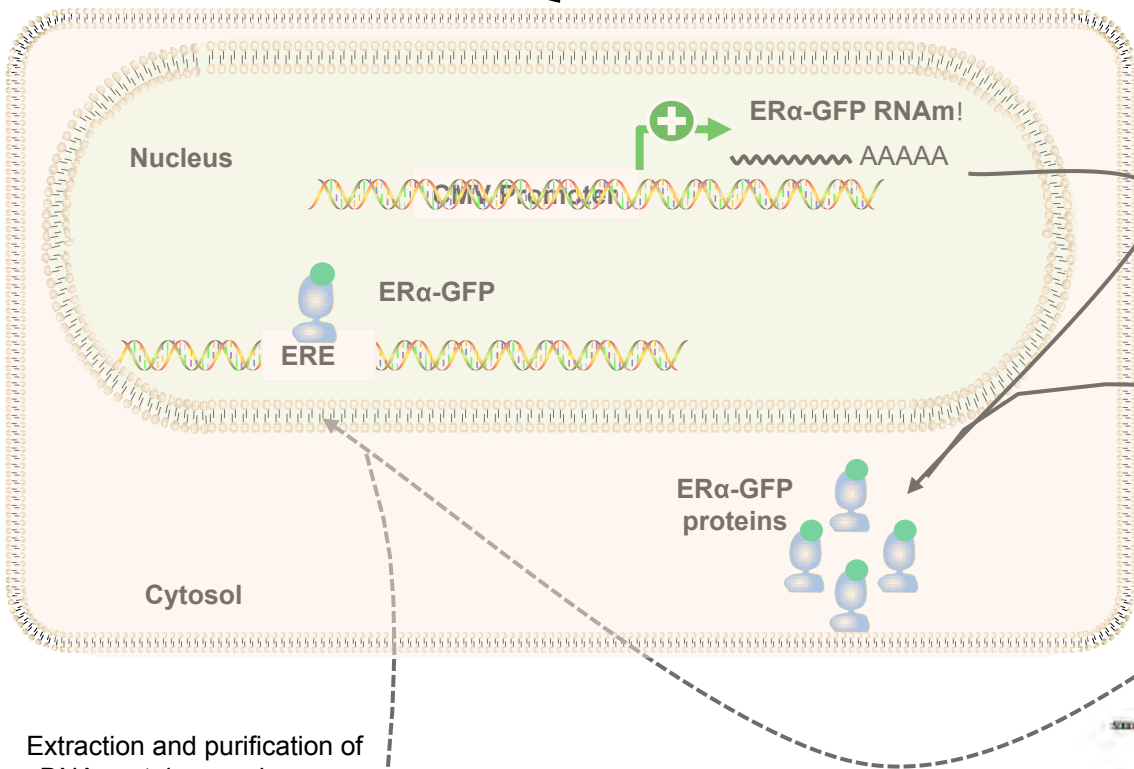

Growth of trasfected cells disomogenous population

UV laser

Sorting of GFP cells omogenous population

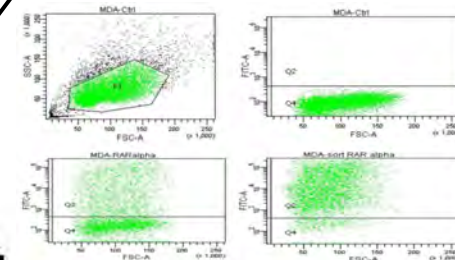

Extraction and purification of DNA-protein complexes

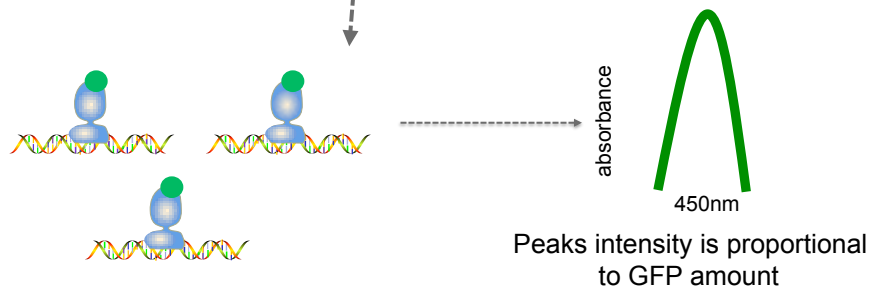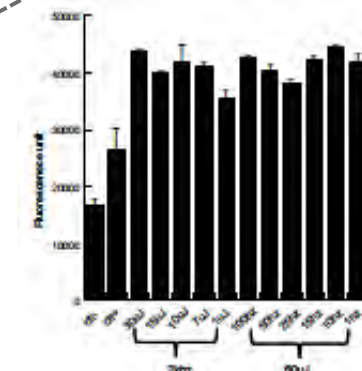

Supplementary Figure S4:  
Generation of MDA-MB-231  
breast cancer cells, negative  
for ERα and stably expressing  
GFP- ERα fusion protein

| RR (Hz) | Pulse energy (μJ) |   |   |   |   |   |   |   |   |   |   |   |   |   |   | Total energy (Hz*μJ) |
|---------|-------------------|---|---|---|---|---|---|---|---|---|---|---|---|---|---|----------------------|
| 1       | 60                |   |   |   |   |   |   |   |   |   |   | ✓ |   |   |   | 60                   |
| 10      | 60                |   |   |   |   |   |   |   |   |   |   | ✓ |   |   |   | 600                  |
| 6       | 150               |   | ✓ |   |   |   |   |   |   |   |   | ✓ |   |   |   | 900                  |
| 7,2     | 125               |   | ✓ |   |   |   |   |   |   |   |   | ✓ |   |   |   | 900                  |
| 9       | 100               |   | ✓ |   |   |   |   |   |   |   |   | ✓ |   |   |   | 900                  |
| 15      | 60                |   | ✓ |   |   |   |   |   |   |   |   | ✓ |   |   |   | 900                  |
| 60      | 15                |   |   |   |   |   |   | ✓ |   |   |   | ✓ |   |   |   | 900                  |
| 10      | 140               |   |   |   | ✓ |   |   |   |   |   |   |   |   |   |   | 1400                 |
| 25      | 60                |   |   |   |   |   |   |   |   |   |   | ✓ |   |   |   | 1500                 |
| 15      | 125               |   |   |   | ✓ |   |   |   |   |   |   |   |   |   |   | 1875                 |
| 2000    | 1                 |   |   |   |   |   |   |   |   |   |   | ✓ |   |   |   | 2000                 |
| 50      | 60                |   |   |   |   |   |   |   |   |   |   | ✓ |   |   |   | 3000                 |
| 30      | 125               |   |   | ✓ | ✓ |   |   |   |   |   |   | ✓ |   |   |   | 3750                 |
| 30      | 140               |   |   |   |   |   |   |   |   |   |   |   |   |   |   | 4200                 |
| 50      | 100               |   |   | ✓ |   |   |   | ✓ |   |   |   |   |   |   |   | 5000                 |
| 48      | 125               |   | ✓ |   |   |   |   |   |   |   |   |   |   | ✓ |   | 6000                 |
| 40      | 150               |   | ✓ |   |   |   |   |   |   |   |   |   |   | ✓ |   | 6000                 |
| 60      | 100               |   | ✓ |   |   |   |   |   |   |   |   |   |   | ✓ |   | 6000                 |
| 100     | 60                |   | ✓ |   |   |   |   |   |   |   |   |   |   | ✓ |   | 6000                 |
| 60      | 125               |   |   | ✓ | ✓ |   |   |   |   |   |   |   |   | ✓ |   | 7500                 |
| 1000    | 8                 |   |   |   | ✓ |   |   |   |   |   |   |   |   |   |   | 8000                 |
| 100     | 110               |   |   |   | ✓ |   |   |   |   |   |   |   |   |   |   | 11000                |
| 200     | 60                |   |   | ✓ |   |   |   |   |   |   |   |   |   |   |   | 12000                |
| 100     | 125               |   |   | ✓ | ✓ |   |   |   |   |   |   |   |   | ✓ |   | 12500                |
| 100     | 140               |   |   |   | ✓ |   |   |   |   |   |   |   |   |   |   | 14000                |
| 2000    | 7                 | ✓ | ✓ | ✓ | ✓ |   | ✓ | ✓ | ✓ | ✓ | ✓ | ✓ | ✓ | ✓ | ✓ | 14000                |
| 2000    | 8                 |   |   |   |   |   |   |   |   |   |   |   |   | ✓ |   | 16000                |
| 2000    | 10                |   | ✓ |   |   |   |   |   |   |   |   |   |   | ✓ |   | 20000                |
| 200     | 100               |   | ✓ |   |   |   |   |   |   |   |   |   |   | ✓ |   | 20000                |
| 160     | 125               |   | ✓ |   |   |   |   |   |   |   |   |   |   |   |   | 20000                |
| 134     | 150               |   | ✓ |   |   |   |   |   |   |   |   |   |   | ✓ |   | 20100                |
| 200     | 125               |   |   |   | ✓ | ✓ | ✓ | ✓ |   |   |   | ✓ |   |   |   | 25000                |
| 2000    | 15                |   |   | ✓ | ✓ | ✓ | ✓ | ✓ | ✓ | ✓ | ✓ | ✓ |   |   |   | 30000                |
| 20000   | 2                 |   |   |   | ✓ |   |   |   |   |   |   |   |   |   |   | 40000                |
| 5000    | 8                 |   |   |   | ✓ |   |   |   |   |   |   |   |   |   |   | 40000                |
| 7000    | 7                 |   |   |   |   | ✓ |   |   | ✓ |   |   | ✓ |   |   |   | 49000                |
| 400     | 125               |   |   | ✓ | ✓ |   |   |   |   |   |   |   |   | ✓ |   | 50000                |
| 2000    | 30                |   | ✓ | ✓ | ✓ | ✓ | ✓ | ✓ | ✓ | ✓ | ✓ | ✓ |   |   |   | 60000                |
| 480     | 125               |   |   | ✓ | ✓ | ✓ | ✓ | ✓ |   |   |   | ✓ | ✓ |   |   | 60000                |
| 400     | 150               |   | ✓ |   | ✓ | ✓ | ✓ | ✓ |   |   |   | ✓ | ✓ |   |   | 60000                |
| 600     | 100               |   | ✓ |   | ✓ | ✓ | ✓ | ✓ |   |   |   | ✓ | ✓ |   |   | 60000                |
| 500     | 125               |   |   |   | ✓ |   |   |   |   |   |   |   |   |   |   | 62500                |
| 480     | 150               |   | ✓ |   |   |   |   |   |   |   |   |   |   |   |   | 72000                |
| 2000    | 60                |   |   | ✓ | ✓ | ✓ | ✓ | ✓ | ✓ | ✓ | ✓ | ✓ |   |   |   | 120000               |
| 1000    | 125               |   |   | ✓ | ✓ |   |   |   |   |   |   |   |   | ✓ |   | 125000               |
| 20000   | 8                 | ✓ |   | ✓ | ✓ | ✓ | ✓ | ✓ |   |   |   | ✓ |   |   |   | 160000               |
| 2000    | 90                |   |   |   | ✓ | ✓ | ✓ | ✓ | ✓ | ✓ | ✓ | ✓ |   |   |   | 180000               |
| 2000    | 125               | ✓ |   | ✓ | ✓ | ✓ | ✓ | ✓ | ✓ | ✓ | ✓ | ✓ | ✓ | ✓ | ✓ | 250000               |
| 2000    | 140               |   |   |   | ✓ |   |   |   |   |   |   |   |   |   |   | 280000               |
| 20000   | 14                |   |   |   | ✓ |   |   |   |   |   |   |   |   |   |   | 280000               |
| 2000    | 150               |   |   |   | ✓ |   |   |   |   |   |   |   |   |   |   | 300000               |

- ChIP
- photos and counts
- PI
- Fluorescence
- WB
- Comet assay
- eosin-ematoxylin coloration
- ROS
- Caspase
- Dimers
- Cell cycle
- WGA staining
- Phalloidin staining

**Supplementary Table S1:** Different irradiation conditions used.

**Supplementary Table S2:** Different irradiation conditions used.

| RR (Hz) | Pulse energy (μJ) | 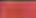 | 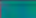 | 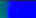 | 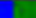 | 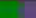 | 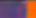 | 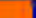 | 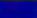 | 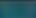 | 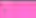 | 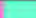 | 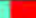 | 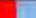 | 260nm | 300nm | Total energy (Hz*μJ) |
|---------|-------------------|-----------------------------------------------------------------------------------|-----------------------------------------------------------------------------------|-----------------------------------------------------------------------------------|-----------------------------------------------------------------------------------|-----------------------------------------------------------------------------------|-----------------------------------------------------------------------------------|-----------------------------------------------------------------------------------|-----------------------------------------------------------------------------------|-----------------------------------------------------------------------------------|-----------------------------------------------------------------------------------|-----------------------------------------------------------------------------------|-----------------------------------------------------------------------------------|-------------------------------------------------------------------------------------|-------|-------|----------------------|
| 2000    | 1                 |                                                                                   | ✓                                                                                 |                                                                                   |                                                                                   |                                                                                   |                                                                                   |                                                                                   |                                                                                   |                                                                                   |                                                                                   |                                                                                   |                                                                                   |                                                                                     | ✓     | ✓     | 2000                 |
| 2000    | 3                 |                                                                                   | ✓                                                                                 |                                                                                   |                                                                                   |                                                                                   |                                                                                   |                                                                                   |                                                                                   |                                                                                   |                                                                                   |                                                                                   |                                                                                   |                                                                                     | ✓     | ✓     | 6000                 |
| 2000    | 1                 |                                                                                   | ✓                                                                                 |                                                                                   |                                                                                   |                                                                                   |                                                                                   |                                                                                   |                                                                                   |                                                                                   |                                                                                   |                                                                                   |                                                                                   |                                                                                     | ✓     | ✓     | 8000                 |
| 2000    | 1                 | ✓                                                                                 | ✓                                                                                 | ✓                                                                                 | ✓                                                                                 | ✓                                                                                 | ✓                                                                                 | ✓                                                                                 |                                                                                   |                                                                                   | ✓                                                                                 |                                                                                   |                                                                                   |                                                                                     | ✓     | ✓     | 14000                |
| 7000    | 7                 |                                                                                   | ✓                                                                                 |                                                                                   |                                                                                   | ✓                                                                                 |                                                                                   |                                                                                   |                                                                                   |                                                                                   |                                                                                   |                                                                                   |                                                                                   |                                                                                     | ✓     | ✓     | 49000                |

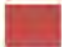

ChIP

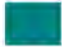

photos and counts

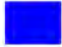

PI

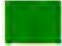

Fluorescence

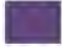

WB

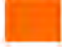

Comet assay

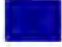

eosin-ematoxylin coloration

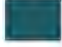

ROS

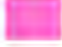

Caspase

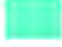

Dimers

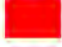

Cell cycle

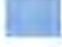

WGA staining

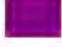

Phalloidin staining
